# Supplementary material for: SCCA1/SERPINB3 suppresses antitumor immunity and blunts therapy-induced T cell responses via STAT-dependent chemokine production
Source: J Clin Invest. 2023 Aug 1;133(15):e163841. doi: 10.1172/JCI163841 (PMC10378164; doi:10.1172/JCI163841)
Supplement: Supplemental data [file jci-133-163841-s148.pdf]

# **SCCA1/SERPINB3 suppresses anti-tumor immunity and blunts therapy-induced T cell responses via STAT-dependent chemokine production**

Liyun Chen, Victoria Shi, Songyan Wang, Lulu Sun, Rebecca Freeman, Jasmine Yang, Matthew J Inkman, Subhajit Ghosh, Fiona Ruiz, Kay Jayachandran, Yi Huang, Jingqin Luo, Jin Zhang, Pippa Cosper, Clifford J. Luke, Catherine S Spina, Perry W. Grigsby, Julie K. Schwarz, Stephanie Markovina

## **Supplemental Figures**

Supplemental Figure 1

A

| SERPINB3                         | Significant | P Value |
|----------------------------------|-------------|---------|
| Common myeloid progenitor        |             |         |
| low vs. int                      | No          | 0.7867  |
| low vs. high                     | No          | 0.9826  |
| int vs. high                     | No          | 0.77    |
| Myeloid dendritic cell           |             |         |
| low vs. int                      | No          | 0.8652  |
| low vs. high                     | No          | 0.4333  |
| int vs. high                     | No          | 0.3405  |
| Myeloid dendritic cell activated |             |         |
| low vs. int                      | No          | 0.0741  |
| low vs. high                     | Yes         | 0.0253  |
| int vs. high                     | Yes         | 0.0001  |
| Plasmacytoid dendritic cell      |             |         |
| low vs. int                      | No          | 0.3424  |
| low vs. high                     | Yes         | 0.0067  |
| int vs. high                     | No          | 0.0774  |
| Monocyte progenitor              |             |         |
| low vs. int                      | No          | 0.7884  |
| low vs. high                     | No          | 0.1243  |
| int vs. high                     | No          | 0.2044  |
| Monocyte                         |             |         |
| low vs. int                      | No          | 0.6591  |
| low vs. high                     | Yes         | 0.0206  |
| int vs. high                     | No          | 0.0606  |
| Macrophage                       |             |         |
| low vs. int                      | No          | 0.8877  |
| low vs. high                     | Yes         | 0.0194  |
| int vs. high                     | No          | 0.0939  |
| Macrophage M1                    |             |         |
| low vs. int                      | No          | 0.9943  |
| low vs. high                     | No          | 0.1478  |
| int vs. high                     | No          | 0.1498  |
| Macrophage M2                    |             |         |
| low vs. int                      | No          | 0.065   |
| low vs. high                     | Yes         | 0.0143  |
| int vs. high                     | Yes         | 0.0091  |
| Mast cell                        |             |         |
| low vs. int                      | No          | 0.5707  |
| low vs. high                     | No          | 0.2906  |
| int vs. high                     | No          | 0.1046  |
| Neutrophil                       |             |         |
| low vs. int                      | No          | 0.7326  |
| low vs. high                     | No          | 0.9332  |
| int vs. high                     | No          | 0.6705  |
| Eosinophil                       |             |         |
| low vs. int                      | No          | 0.9608  |
| low vs. high                     | No          | 0.9429  |
| int vs. high                     | No          | 0.982   |

| SERPINB3                     | Significant | P Value |
|------------------------------|-------------|---------|
| Common lymphoid progenitor   |             |         |
| low vs. int                  | No          | 0.7629  |
| low vs. high                 | No          | 0.509   |
| int vs. high                 | No          | 0.3361  |
| T cell CD4+ memory           |             |         |
| low vs. int                  | No          | 0.9422  |
| low vs. high                 | No          | 0.0761  |
| int vs. high                 | No          | 0.0649  |
| T cell CD4+ naive            |             |         |
| low vs. int                  | No          | 0.6046  |
| low vs. high                 | No          | 0.4622  |
| int vs. high                 | No          | 0.8279  |
| T cell CD4+ (non-regulatory) |             |         |
| low vs. int                  | No          | 0.844   |
| low vs. high                 | No          | 0.9448  |
| int vs. high                 | No          | 0.8985  |
| T cell regulatory (Tregs)    |             |         |
| low vs. int                  | No          | 0.421   |
| low vs. high                 | Yes         | 0.0126  |
| int vs. high                 | No          | 0.4693  |
| T cell CD4+ central memory   |             |         |
| low vs. int                  | No          | 0.9889  |
| low vs. high                 | No          | 0.199   |
| int vs. high                 | No          | 0.1942  |
| T cell CD4+ effector memory  |             |         |
| low vs. int                  | No          | 0.5579  |
| low vs. high                 | No          | 0.5985  |
| int vs. high                 | No          | 0.266   |
| T cell CD8+ naive            |             |         |
| low vs. int                  | No          | 0.5356  |
| low vs. high                 | No          | 0.5676  |
| int vs. high                 | No          | 0.9617  |
| T cell CD8+                  |             |         |
| low vs. int                  | No          | 0.8964  |
| low vs. high                 | Yes         | 0.0019  |
| int vs. high                 | Yes         | 0.0358  |
| T cell CD8+ central memory   |             |         |
| low vs. int                  | No          | 0.5493  |
| low vs. high                 | Yes         | 0.0031  |
| int vs. high                 | No          | 0.0685  |
| T cell CD8+ effector memory  |             |         |
| low vs. int                  | No          | 0.3361  |
| low vs. high                 | No          | 0.4473  |
| int vs. high                 | No          | 0.8398  |
| T cell gamma delta           |             |         |
| low vs. int                  | No          | 0.8413  |
| low vs. high                 | No          | 0.3951  |
| int vs. high                 | No          | 0.2935  |

| SERPINB3                     | Significant | P Value |
|------------------------------|-------------|---------|
| T cell CD4+ Th1              |             |         |
| low vs. int                  | No          | 0.4074  |
| low vs. high                 | Yes         | 0.0045  |
| int vs. high                 | Yes         | 0.0209  |
| T cell CD4+ Th2              |             |         |
| low vs. int                  | No          | 0.1065  |
| low vs. high                 | No          | 0.0955  |
| int vs. high                 | No          | 0.1335  |
| T cell NK                    |             |         |
| low vs. int                  | No          | 0.0644  |
| low vs. high                 | Yes         | 0.0019  |
| int vs. high                 | No          | 0.4783  |
| NK cell                      |             |         |
| low vs. int                  | No          | 0.6759  |
| low vs. high                 | No          | 0.7338  |
| int vs. high                 | No          | 0.9379  |
| B cell                       |             |         |
| low vs. int                  | No          | 0.0952  |
| low vs. high                 | No          | 0.0613  |
| int vs. high                 | No          | 0.2501  |
| B cell memory                |             |         |
| low vs. int                  | No          | 0.9037  |
| low vs. high                 | No          | 0.7763  |
| int vs. high                 | No          | 0.6854  |
| B cell naive                 |             |         |
| low vs. int                  | No          | 0.9961  |
| low vs. high                 | No          | 0.9924  |
| int vs. high                 | No          | 0.9885  |
| B cell plasma                |             |         |
| low vs. int                  | No          | 0.468   |
| low vs. high                 | No          | 0.8337  |
| int vs. high                 | No          | 0.606   |
| Class-switched memory B cell |             |         |
| low vs. int                  | No          | 0.0836  |
| low vs. high                 | No          | 0.2371  |
| int vs. high                 | No          | 0.115   |

| SERPINB3 vs overall immune score |                     |                |
|----------------------------------|---------------------|----------------|
|                                  | Non-recurrence (NR) | Recurrence (R) |
| Pearson r                        | 0.5909              | 0.2132         |
| P value                          | 0.0048              | 0.3061         |
|                                  | *                   | ns             |

**Correlation of SERPINB3 with immune cells and chemokines. (A)** Tables show the comparisons of immune cells in SERPINB3/Low, SERPINB3/Intermediate (int.) and SERPINB3/High. The p-value were corrected from two-way ANOVA with the false discovery rate < 0.05.

Supplemental Figure 1

B

| SERPINB3/High vs SERPINB3/Low (p value) |         |        | SERPINB3/High vs SERPINB3/Low (p value)                                        |        |         |
|-----------------------------------------|---------|--------|--------------------------------------------------------------------------------|--------|---------|
| Myeloid cells                           | NR      | R      | Lymphocytes                                                                    | NR     | R       |
| Common myeloid progenitor               | 0.395   | 0.176  | Common lymphoid progenitor                                                     | 0.153  | 0.400   |
| Myeloid dendritic cell                  | 0.047*  | 0.196  | T cell CD4+ memory                                                             | 0.312  | 0.015*  |
| Myeloid dendritic cell activated        | 0.417   | 0.062  | T cell CD4+ naive                                                              | 0.641  | 0.248   |
| Plasmacytoid dendritic cell             | 0.087   | 0.428  | T cell CD4+ (non-regulatory)                                                   | 0.353  | 0.061   |
| Monocyte progenitor                     | 0.158   | 0.276  | T cell regulatory (Tregs)                                                      | 0.982  | 0.002** |
| Monocyte                                | 0.050*  | 0.643  | T cell CD4+ central memory                                                     | 0.886  | 0.063   |
| Macrophage                              | 0.097   | 0.049* | T cell CD4+ effector memory                                                    | 0.711  | 0.457   |
| Macrophage M1                           | 0.085   | 0.938  | T cell CD8+ naive                                                              | 0.068  | 0.562   |
| Macrophage M2                           | 0.002** | 0.324  | T cell CD8+                                                                    | 0.050* | 0.253   |
| Mast cell                               | 0.075   | 0.068  | T cell CD8+ central memory                                                     | 0.036* | 0.193   |
| Neutrophil                              | 0.176   | 0.585  | T cell CD8+ effector memory                                                    | 0.122  | 0.299   |
| Eosinophil                              | 0.306   | 0.369  | T cell gamma delta                                                             | 0.035* | 0.211   |
| SERPINB3/High vs SERPINB3/Low (p value) |         |        | T cell CD4+ Th1                                                                | 0.413  | 0.008*  |
| B cells                                 | NR      | R      | T cell CD4+ Th2                                                                | 0.126  | 0.454   |
| B cell                                  | 0.738   | 0.361  | T cell NK                                                                      | 0.547  | 0.011*  |
| B cell memory                           | 0.201   | 0.476  | NK cell                                                                        | 0.077  | 0.871   |
| B cell naive                            | 0.235   | 0.766  | P value shown in green indicates significantly higher in B3/H compared to B3/L |        |         |
| B cell plasma                           | 0.034*  | 0.792  | P value shown in red indicates significantly lower in B3/H compared to B3/L    |        |         |
| Class-switched memory B cell            | 0.492   | 0.391  |                                                                                |        |         |

**Correlation of SERPINB3 with immune cells and chemokines. (B)** Tables show the p-value from multiple t-test analysis for heatmaps of immune cell subsets in non-recurrent (NR) and recurrent (R) B3/High vs B3/Low tumors.

Supplemental Figure 1

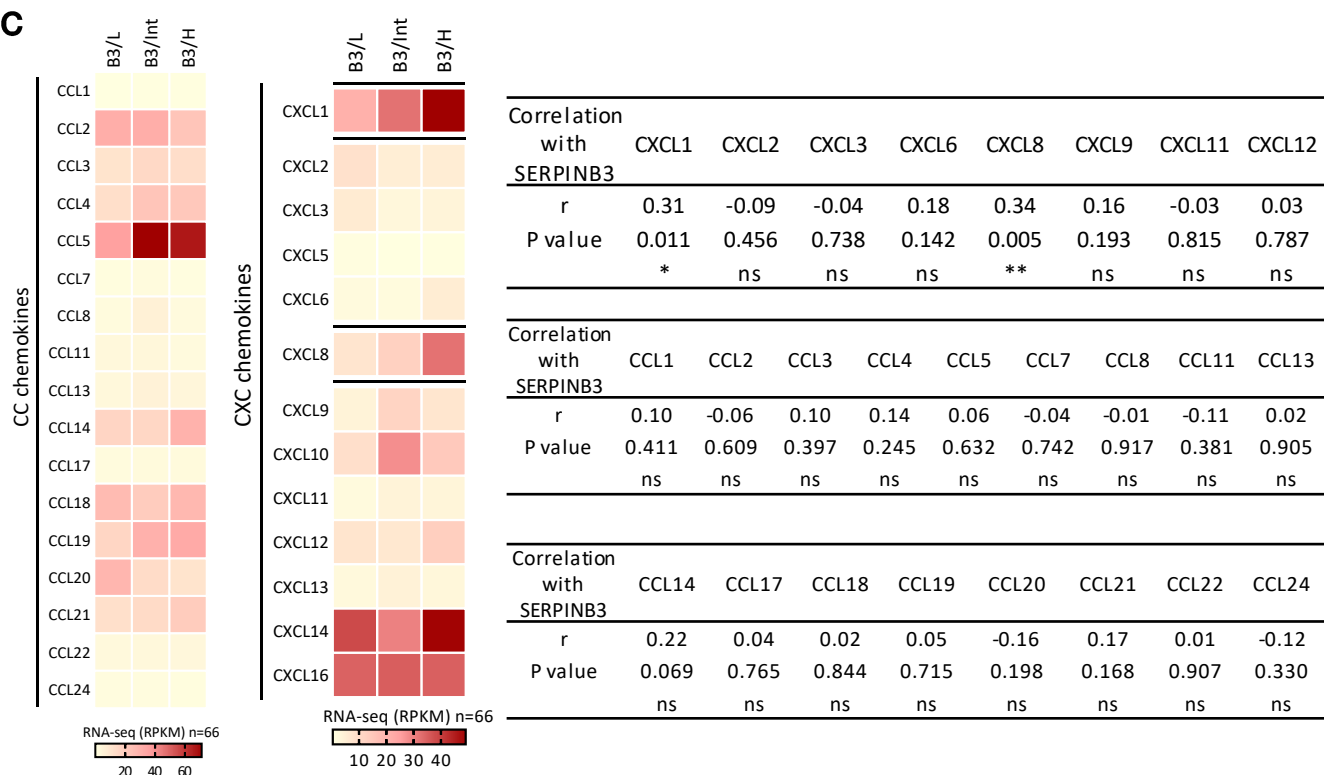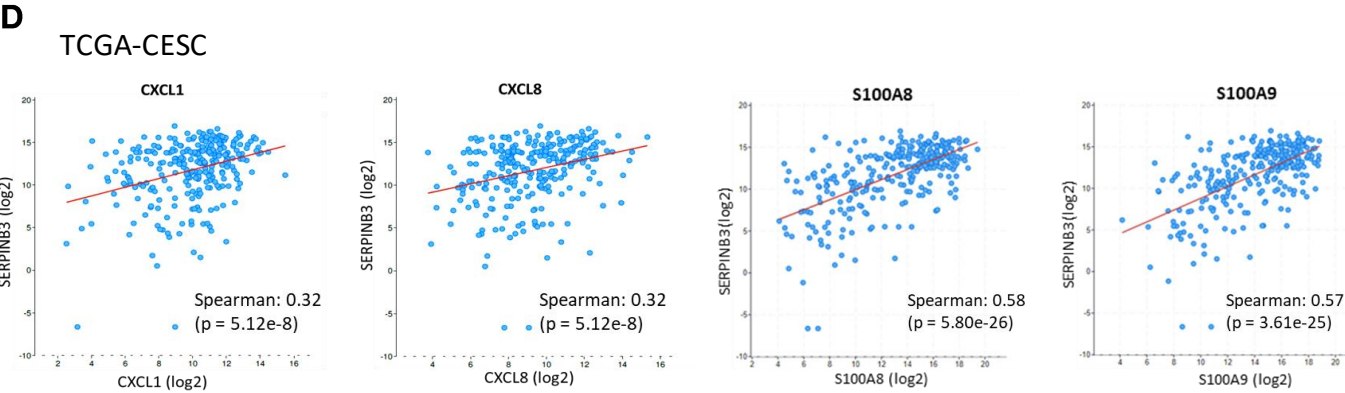

**Correlation of SERPINB3 with immune cells and chemokines (C)** Heatmaps show the relative transcript levels of CC and CXC chemokines in SERPINB3-low (B3/L, n=22), SERPINB3-intermediate (B3/Int, n=22) and SERPINB3-high (B3/H, n=22) tumors. Color intensity is proportional to average transcript expression across samples in the indicated groups. Table shows the correlation coefficient (r) and significance (p value). **(D)** Correlation of SERPINB3 with the expression of CXCL1, CXCL8, S100A8, S100A9 was analyzed using TCGA-CESE (cervical squamous cell carcinoma and endocervical adenocarcinoma, n=306) RNAseq data. Correlation plots were generated using cBioPortal.

Supplemental Figure 1

E

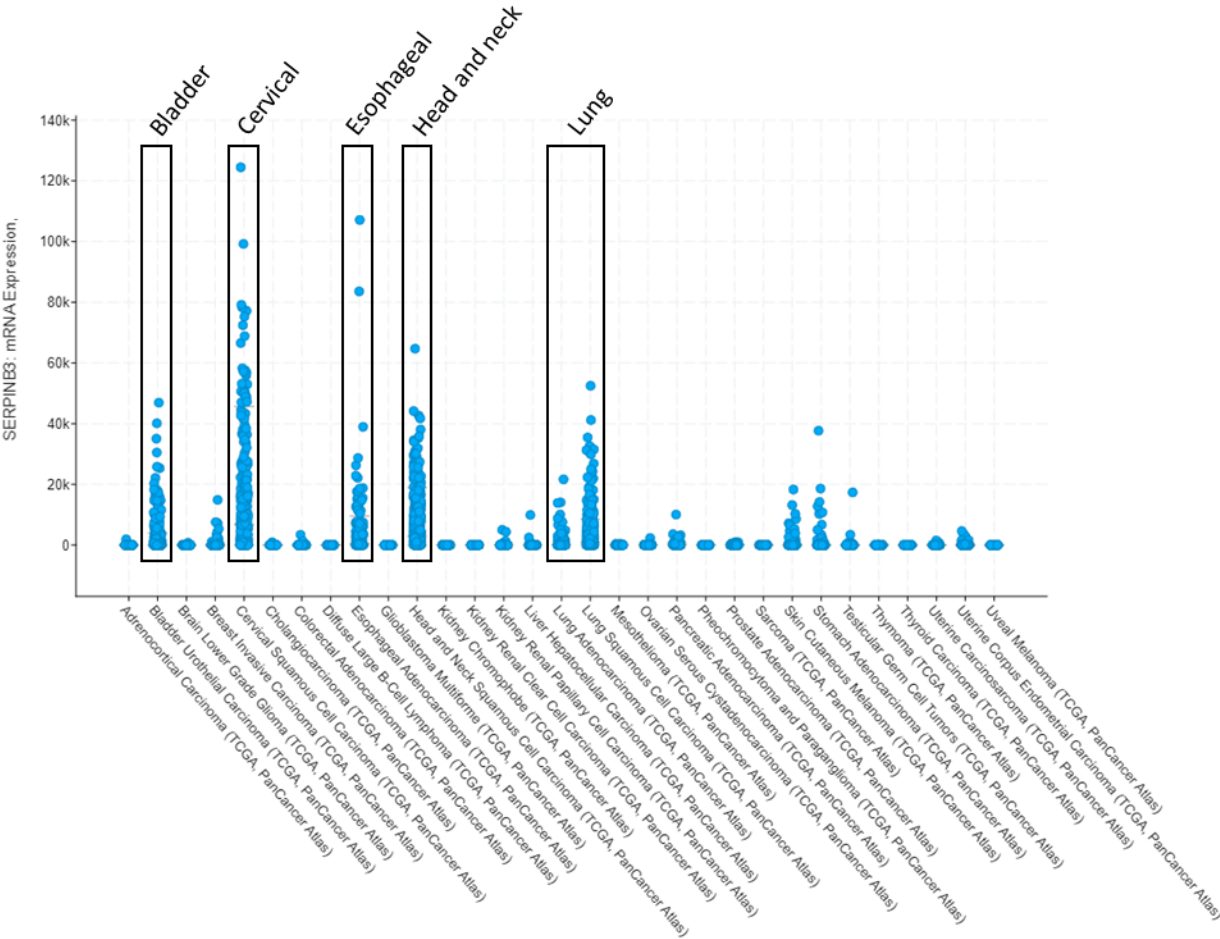

(E) Relative expression levels of SERPINB3 across all cancer types were analyzed using TCGA PanCancer Atlas RNAseq and graph was generated using cBioPortal.

F

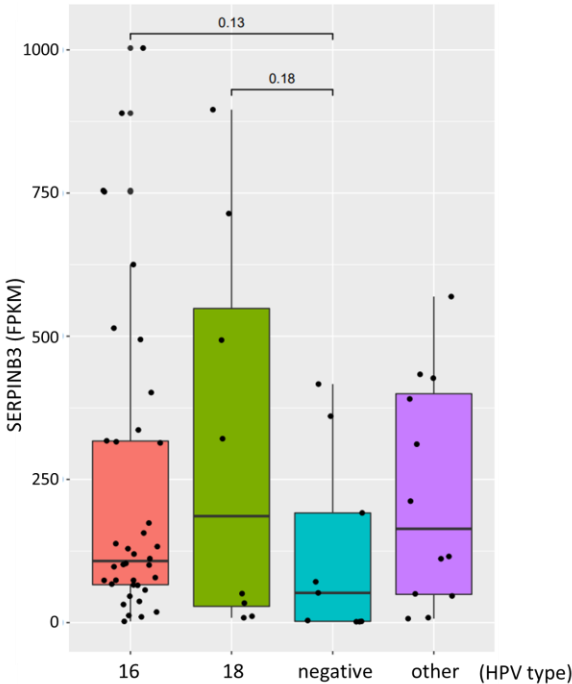

(F) SERPINB3 transcript levels in different HPV subtypes.

Supplemental Figure 2

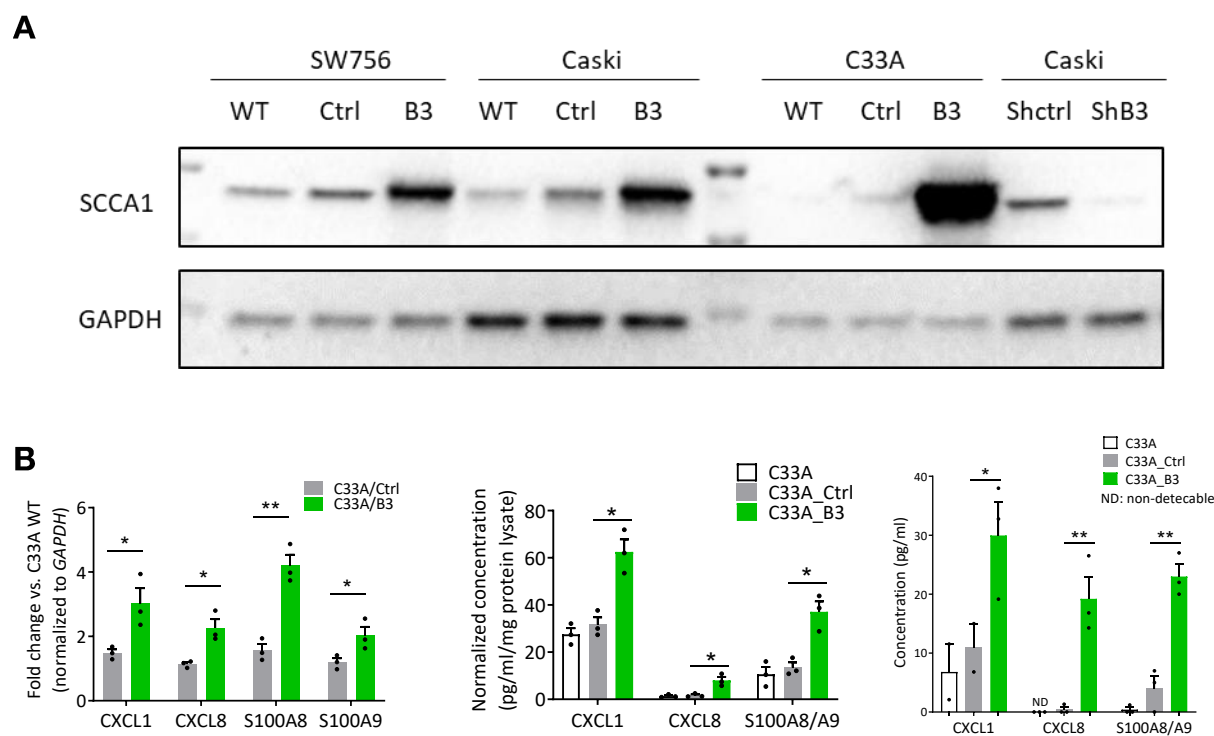

**SERPINB3 expression and chemokine production. (A)** Genetically modified SERPIN3 expression in cervical cancer cell lines was examined by immunoblotting. WT, wild-type parental cells; Ctrl, control vector; B3, SERPINB3-expressing vector; shctrl, scramble shRNA; shB3, shRNA targeting SERPINB3. **(B)** C33A cells were transduced with pUltra vector (C33A/Ctrl) or pUltra-SERPINB3 (C33A/B3). The upregulation of CXCL1/8 and S100A8/A9 expression was examined by qPCR. Gene expression were normalized to GAPDH and fold changes were calculated by comparing to expression levels in parental cells (C33A WT). Chemokine protein expression in cell lysate and secretion was detected by ELISA. Data are presented as mean  $\pm$  SEM of  $n=3$  independent experiments,  $*P < 0.05$ ,  $**P < 0.01$  using Mann-Whitney test (B, left) or one-way ANOVA with Tukey's post hoc test (B, middle and right).

Supplemental Figure 3

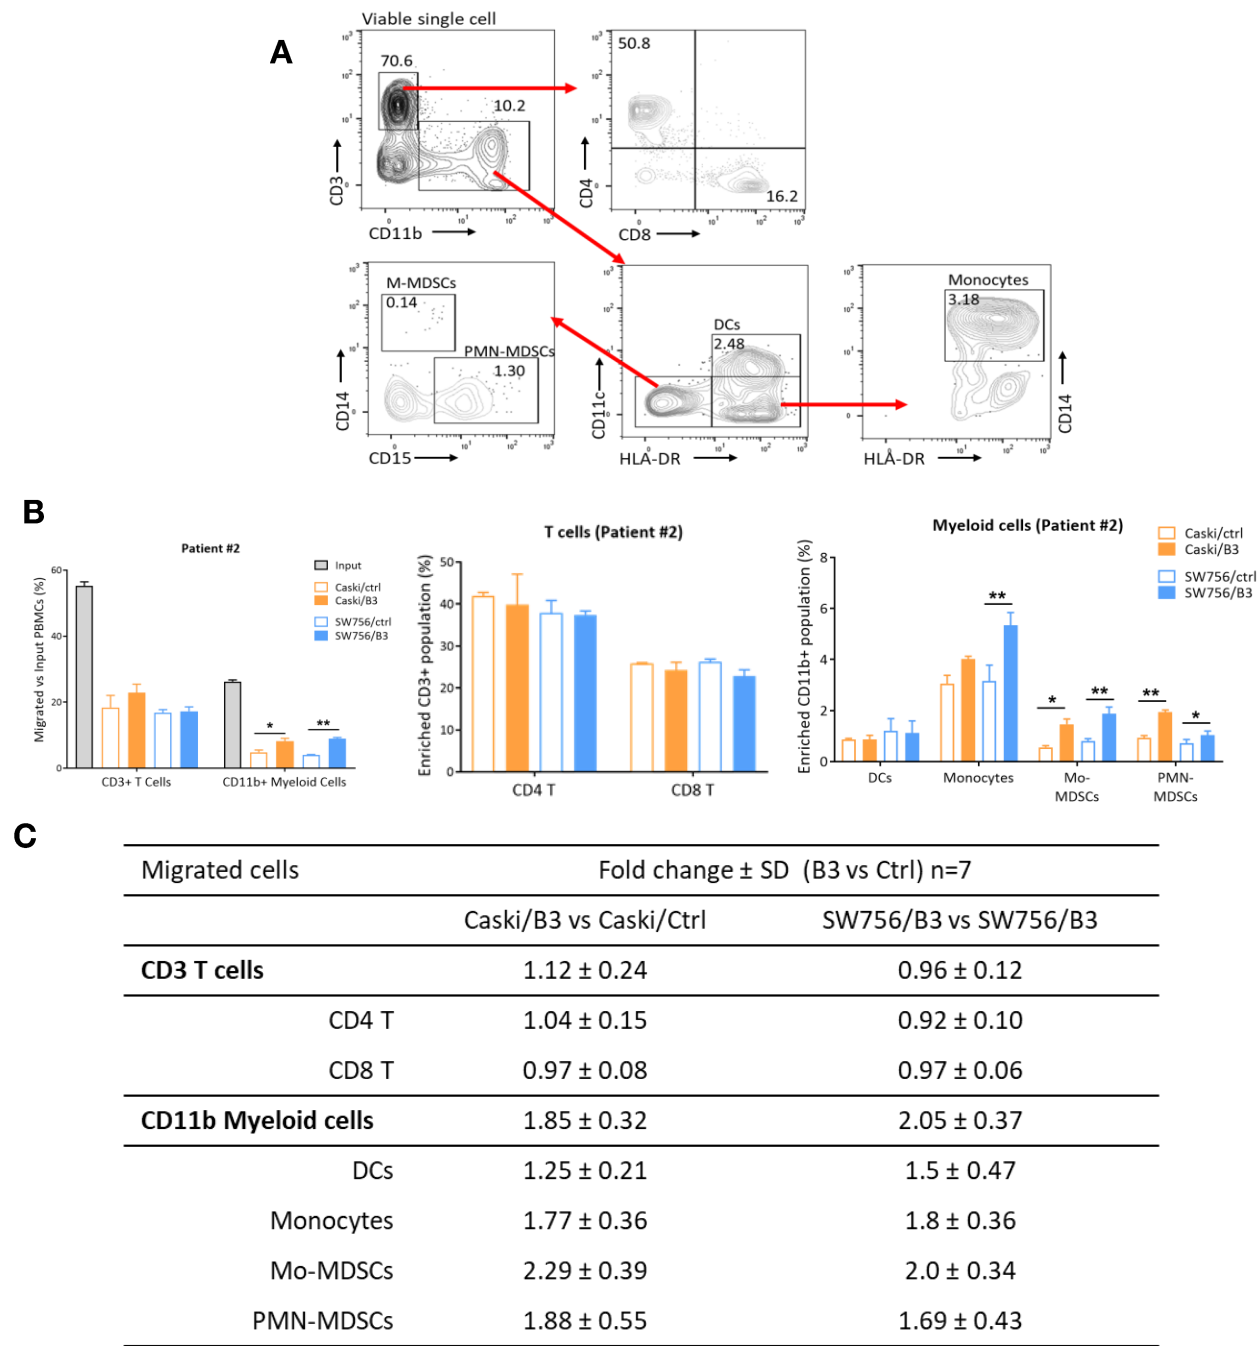

**Migrated PBMC population in transwell assays.** (A) Migrated immune cell populations were identified according to the reported gating strategy, including CD3+CD4+ T lymphocytes, CD3+CD8+ T lymphocytes, CD11b+HLADR+CD11c+ dendritic cells (DCs), CD11b+HLADR+CD14+ monocytes, CD11b+HLADR-CD14+ monocytic myeloid-derived suppressor cells (M-MDSCs), and CD11b+HLADR-CD15+ polymorphonuclear myeloid-derived suppressor cells (PMN-MDSCs). (B) Representative transwell results of 7 independent experiment from 7 individual donors are shown. Each experiment was performed in duplicate transwell assays. Cell migration was calculated as a percentage of the total input PBMCs (left). Enriched migrated cell population was shown as a percentage of specifically phenotyped cells in the total migrated PBMCs (middle and right). mean  $\pm$  SEM are shown, \* $P$  < 0.05, \*\* $P$  < 0.01 using Mann-Whitney test. (C) The table shows the average fold changes from 7 independent experiment of migrated cell population in Caski/B3 or SW756/B3 compared to Caski/Ctrl or SW756/Ctrl supernatant. Data are shown as mean  $\pm$  SEM.

Supplemental Figure 4

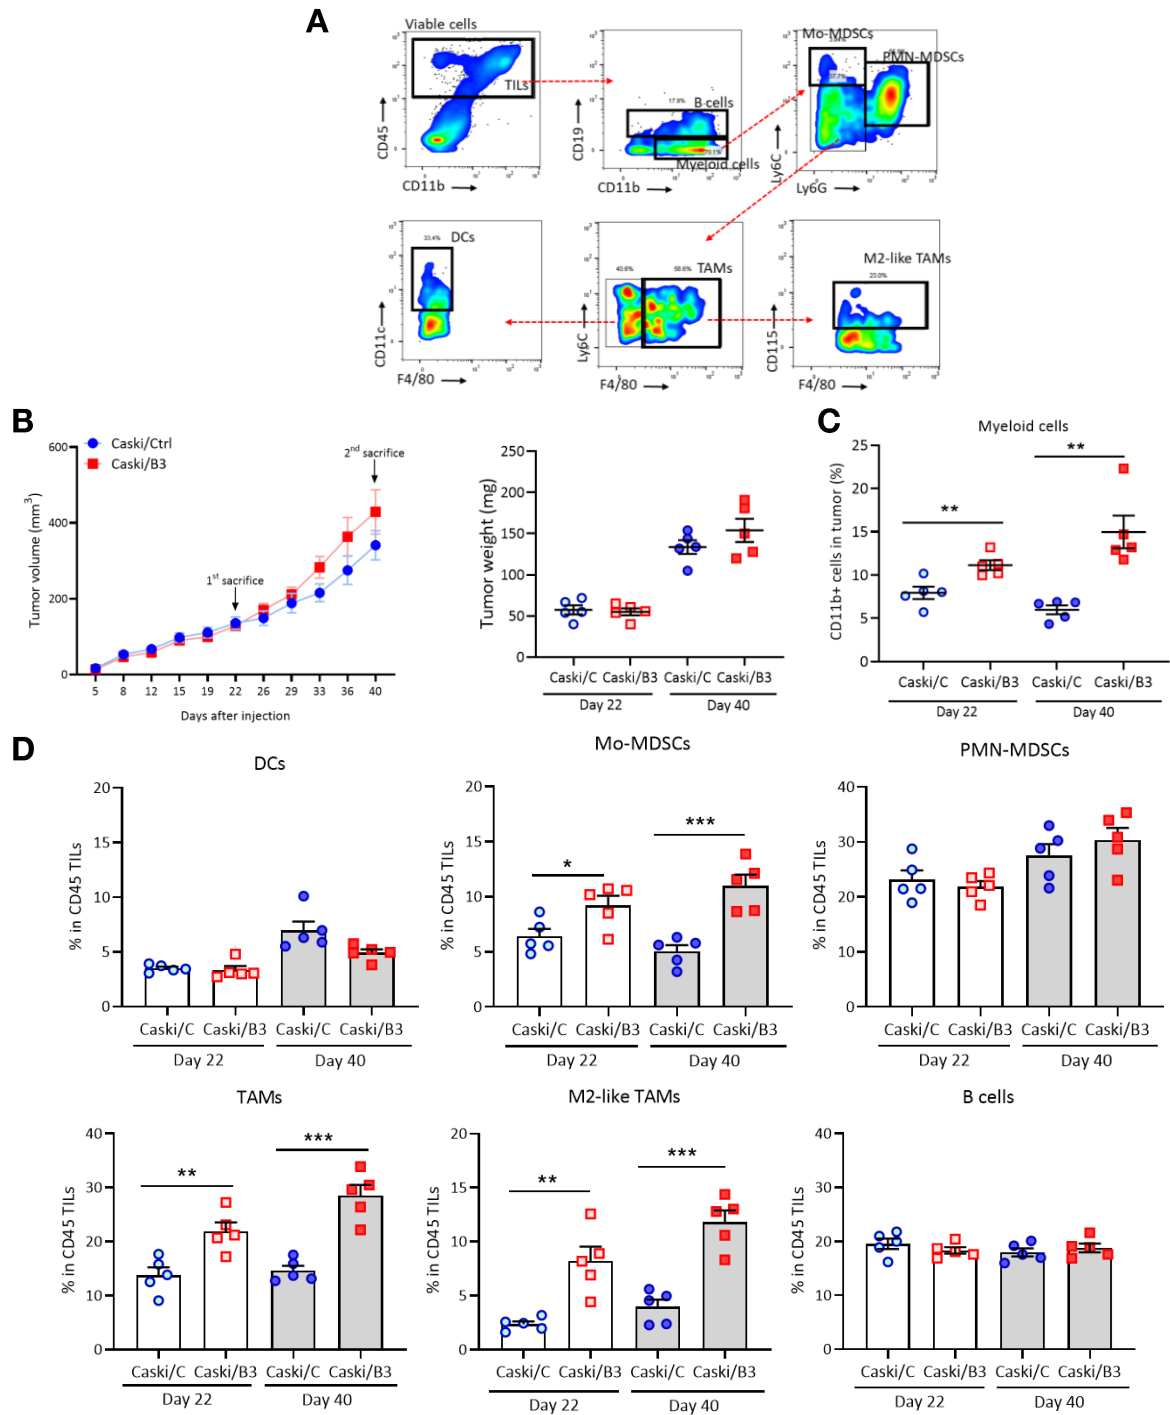

**Myeloid cell infiltration in Caski xenograft tumor models. (A)** Immune cell populations in Caski/Ctrl and Caski/B3 tumors were identified according to the reported gating strategy, including CD11b+Ly6G-Ly6Chigh Mo-MDSCs, CD11b+Ly6G+ PMN-MDSCs, CD11b+Ly6G-F4/80+ TAMs, CD11b+Ly6G-F4/80+CD115+ M2 macrophages, and CD11b+Ly6G-F4/80-CD11c+ DCs. **(B)** Left: Tumor growth curves of nude mice with Caski/Ctrl tumors (blue line) and Caski/B3 tumors (red lines). Right: Tumor weight at the experimental endpoint. Data are shown as mean  $\pm$  SEM with individual data points,  $n=5$  in each group. **(C)** Percentages of CD11b+ myeloid cells in tumors were analyzed by flow cytometry. **(D)** Percentages of each myeloid cell subset in total CD45+ tumor infiltrating leukocytes (TILs) were determined by flow cytometry, according to the gating strategy shown in figure S4A. The graphs represent mean  $\pm$  SEM, with individual data points; \* $P < 0.05$ , \*\* $P < 0.01$ , \*\*\* $P < 0.00101$  using Mann-Whitney test.

Supplemental Figure 5

A

| Genes  | mGapdh |      | mCxcl1 |      | mCxcl3 |      | mCxcl10 |      |
|--------|--------|------|--------|------|--------|------|---------|------|
| Cells  | Ct1    | Ct2  | Ct1    | Ct2  | Ct1    | Ct2  | Ct1     | Ct2  |
| TC1 #1 | 17.6   | 17.0 | 38.9   | 39.1 | 37.1   | 38.1 | 29.1    | 28.3 |
| TC1 #2 | 17.8   | 17.9 | 38.8   | 38.5 | 35.7   | 36.2 | 27.7    | 27.7 |
| LL2 #1 | 17.6   | 17.6 | 26.6   | 26.4 | 29.1   | 28.6 | 21.9    | 21.0 |
| LL2 #2 | 17.5   | 17.7 | 26.1   | 26.0 | 29.5   | 29.3 | 23.0    | 23.2 |

B

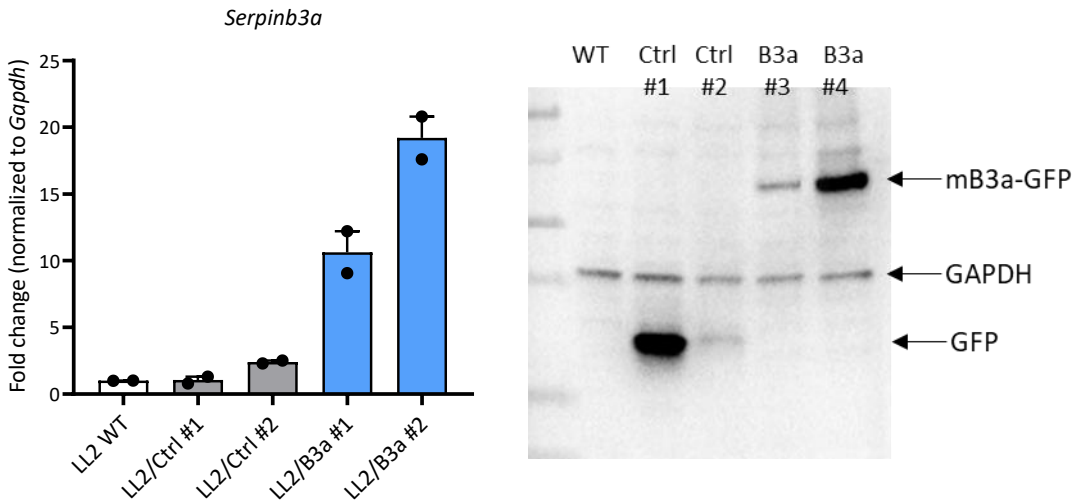

C

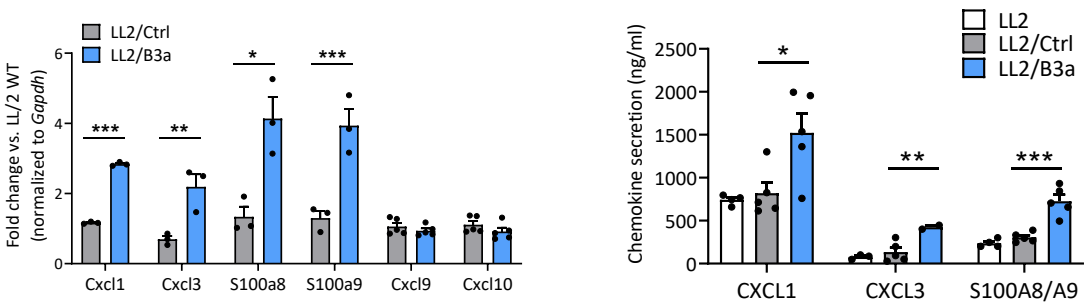

**Murine chemokine and *Serpinb3a* expression.** (A) Chemokine mRNA expression in TC1 and LL2 cells was examined by qPCR. Expression levels were shown as Ct values for each reference gene in all samples. (B) Murine *Serpinb3a* expression in LL2 cells transduced with pLV-C-GFPSpark vector with m*Serpinb3a* sequence (LL2/B3a) or a control vector (LL2/Ctrl) were confirmed by qPCR (left). Gene expression was normalized to mGapdh and fold changes were calculated by comparing to the expression levels in LL2 parental cells. Murine *Serpinb3a*-GFP-fusion protein expression was examined by immunoblotting using anti-GFP antibody (right). Ctrl#1 and B3a#4 shown comparable levels of fusion GFP expression were selected for *in vivo* tumor models. (C) Chemokine expression in LL2 cells transduced with pLV-C-GFPSpark vector with m*Serpinb3a* expression (LL2/B3a) or a control pLV-C-GFPSpark vector (LL2/Ctrl) were examined by qPCR (left) and ELISA (right). Gene expression was normalized to mGapdh and fold changes were calculated by comparing to the expression levels in LL2 parental cells. Data are shown as mean  $\pm$  SEM of  $n = 4$  independent experiments, \* $P < 0.05$ , \*\* $P < 0.01$ , \*\*\* $P < 0.001$  using Mann-Whitney test.

Supplemental Figure 6

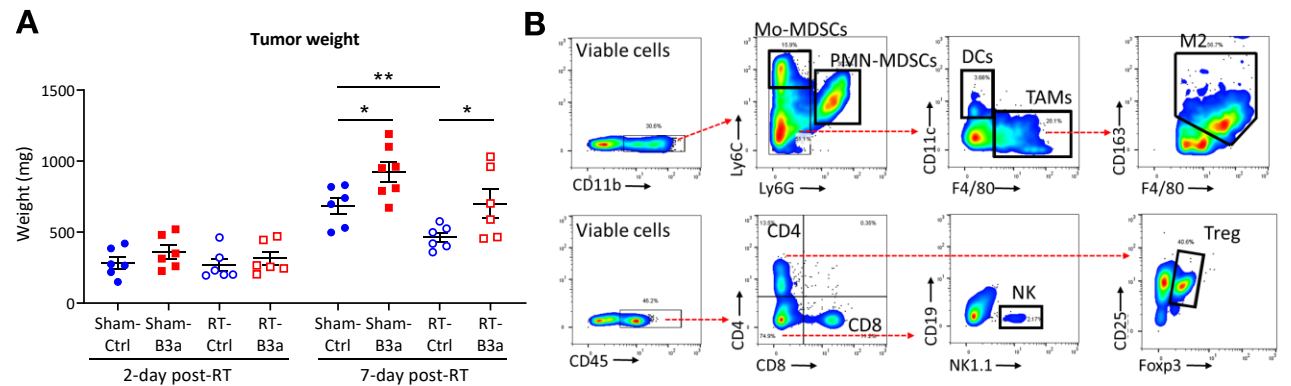

**Immune cells in LL2 tumors. (A)** Tumor weights at 2-day and 7-day post-RT. Data are shown as mean  $\pm$  SEM and each dot represents a biologically independent animal; \* $P < 0.05$ , \*\* $P < 0.01$  using one-way ANOVA with Tukey's post hoc test. **(B)** Immune cell populations in LL2/Ctrl and LL2/B3 tumors were identified according to the reported gating strategy, including CD11b+Ly6G<sup>+</sup>Ly6G<sup>high</sup> Mo-MDSCs, CD11b+Ly6G<sup>+</sup> PMN-MDSCs, CD11b+Ly6G<sup>+</sup>F4/80<sup>+</sup> TAMs, CD11b+Ly6G<sup>+</sup>F4/80<sup>+</sup>CD163<sup>+</sup> M2 macrophages, CD45+CD4<sup>+</sup> T cells, CD45+CD8<sup>+</sup> T cells, and CD45+CD4<sup>+</sup>CD25<sup>+</sup>FoxP3<sup>+</sup> Treg cells.

Supplemental Figure 7

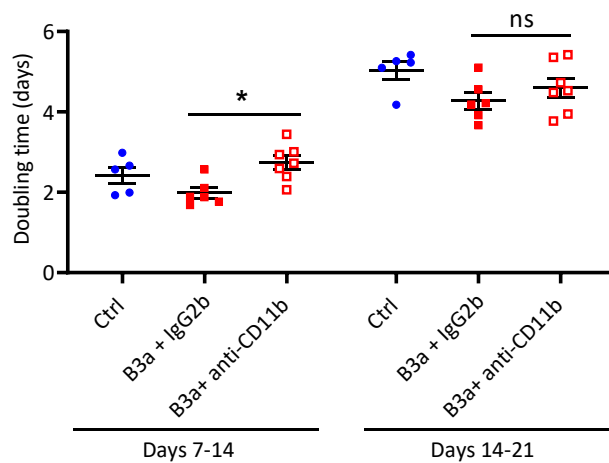

**Tumor doubling time.** Doubling time (DT) from days 7-14 and days 14-21 was calculated by dividing the natural logarithm of 2 by the exponent of growth.  $DT = \text{duration} \times \ln 2 / \ln(v_2/v_1)$ . Data are shown as mean  $\pm$  SEM and each dot represents a biologically independent animal; ns, not significant; \* $P < 0.05$  using one-way ANOVA with Tukey's post hoc test.

Supplemental Figure 8

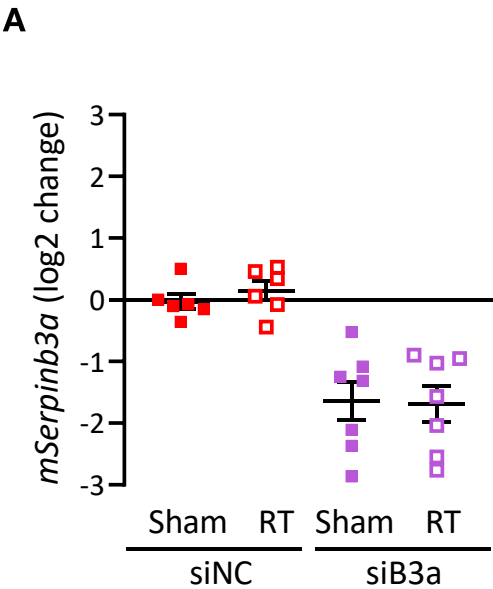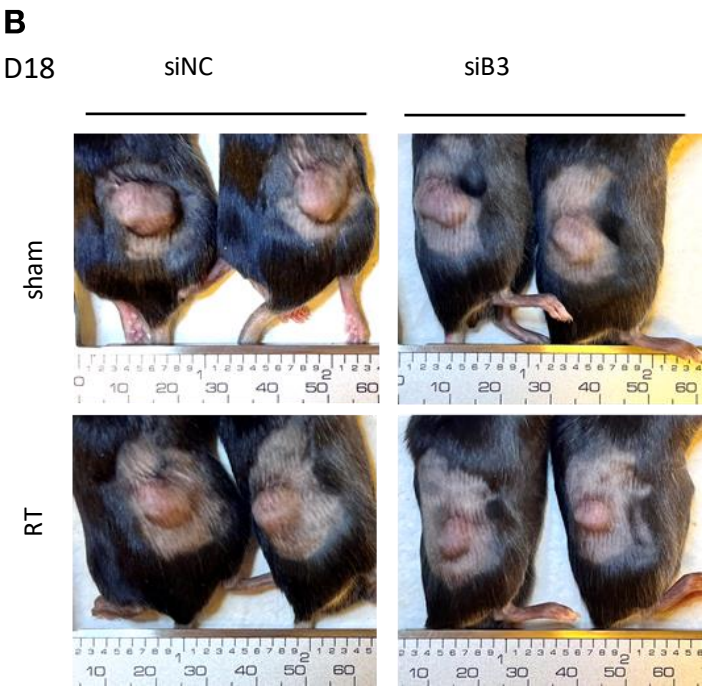

**Targeting SERPINB3 in tumors.** (A) Knockdown of *Serpib3a* in tumors was examined by qPCR. Gene expression were normalized to *mGapdh* and shown as log2 fold change. (B) Images of tumor sizes on day 18. siNC: LL2/B3 treated with negative control siRNA; siB3: LL2/B3 treated with *Serpib3a* siRNA; sham: without radiation treatment, RT: radiation.

Supplemental Figure 9

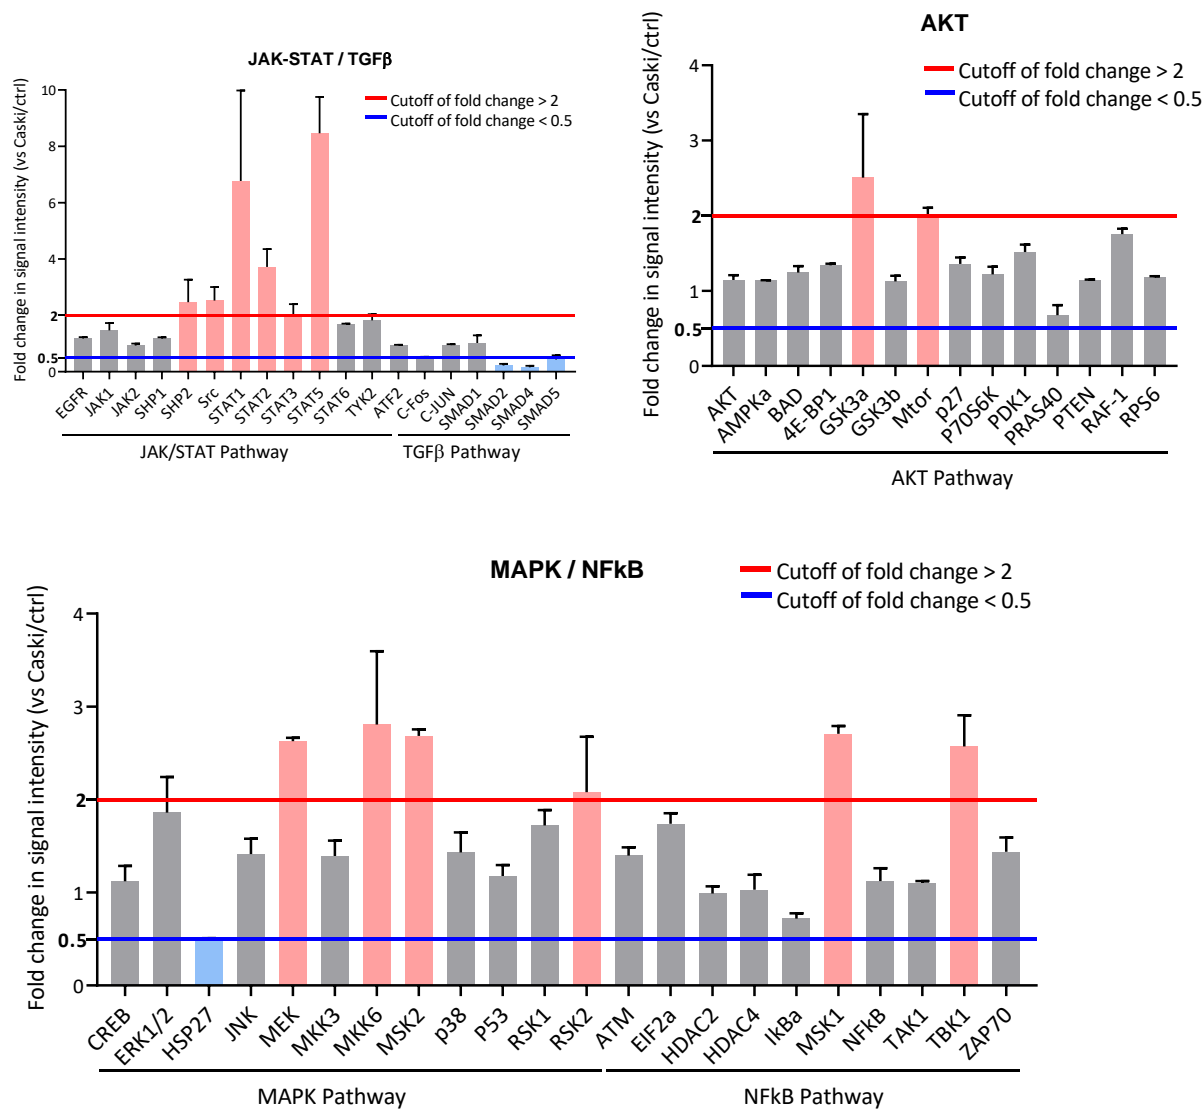

**Phosphorylation protein array.** Human phosphorylation pathway profiling array was used to examine the activation of MAPK, AKT, JAK/STAT, NFκB, and TGFβ signaling. 1 mg of proteins from cell lysate was used for incubation with phosphorylation antibody array. Fold changes in phosphorylation were calculated by normalizing the intensity of both Caski/Ctrl and Caski/B3 to the basal levels in Caski parental cells and comparing the phosphorylation intensity in Caski/B3 to the levels in Caski/Ctrl cells. Red line indicates fold change ≥ 2 and blue line indicates fold change ≤ 0.5.

Supplemental Figure 10

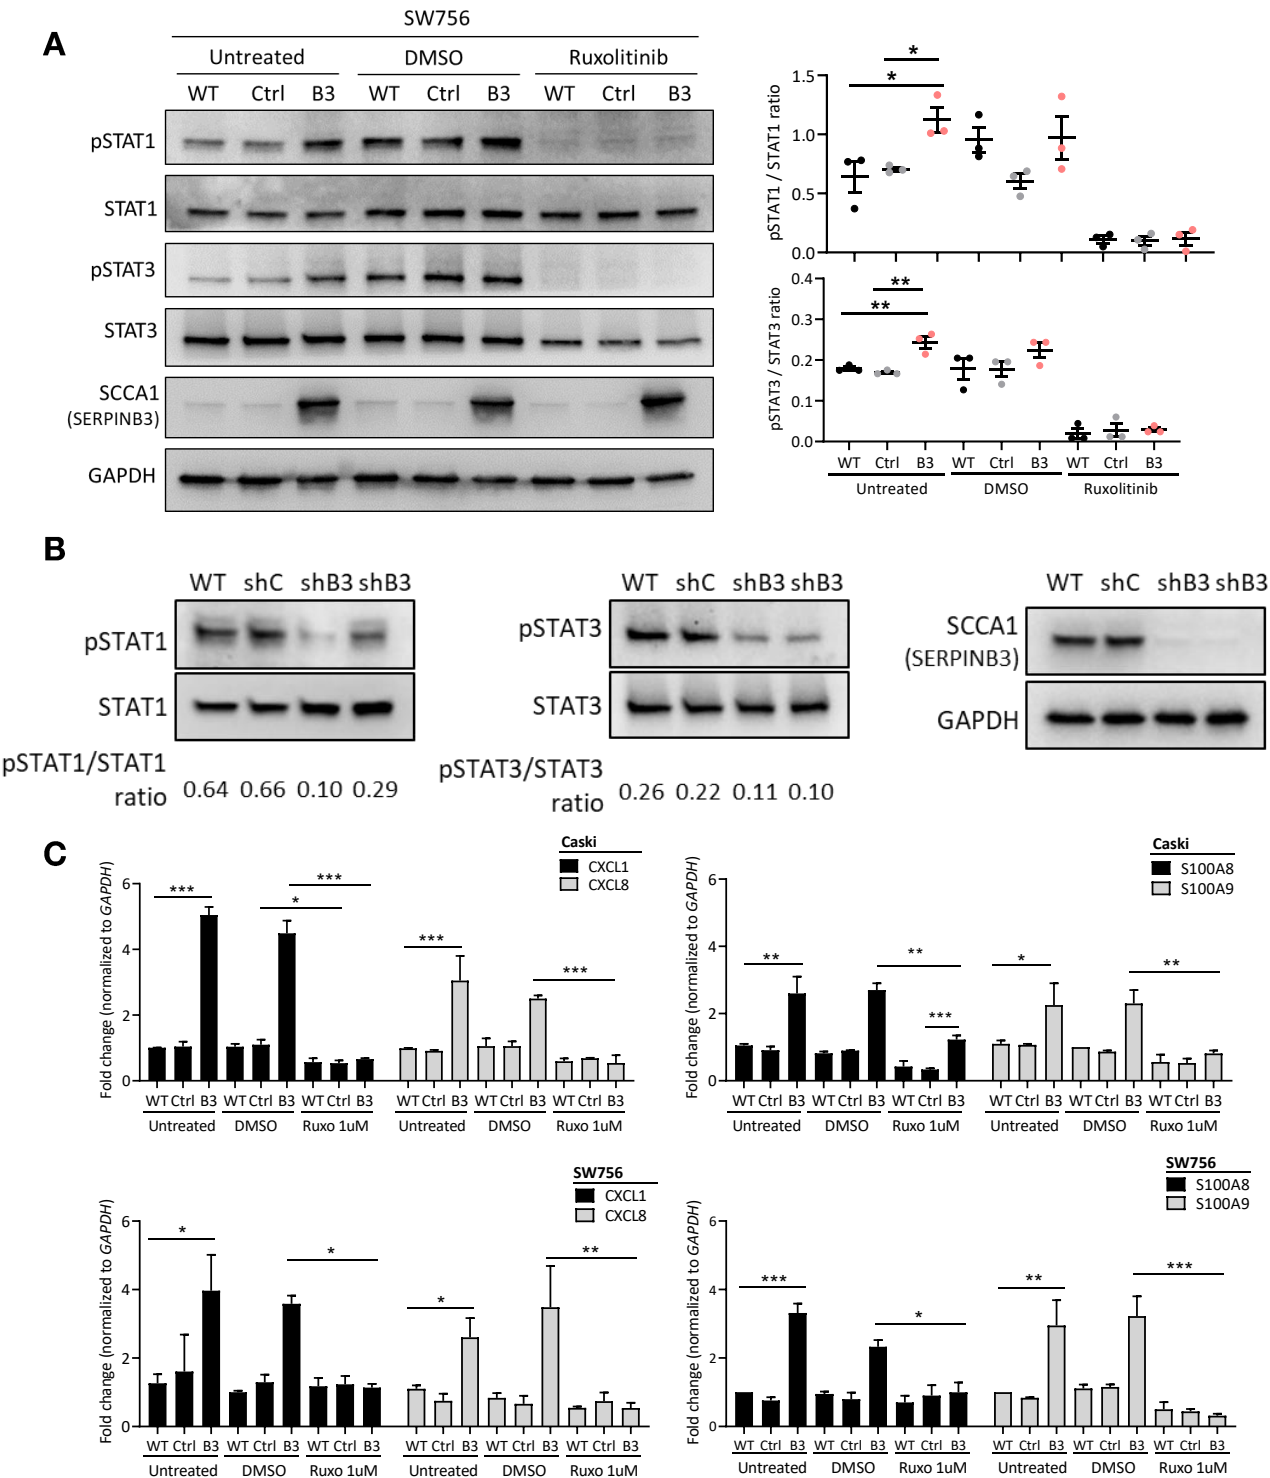

**STAT activation in SERPINB3 cells.** (A) Immunoblotting (left) and quantification (right) show the inhibition of STAT1/3 phosphorylation after treating SW756 parental cells (WT), SW756/Ctrl (C), and SW756/B3 (B3) with 1uM Ruxolitinib for 48 h. (B) Caski cells were transfected with scramble shRNA (shC) or SERPINB3 shRNA (shB3). Immunoblotting shows the reduced STAT1/3 phosphorylation by the knockdown of SERPINB3. (C) Caski/SW756 cells were treated with 1uM Ruxolitinib and the expression CXCL1/8 and S100A8/A9 mRNA was examined by qPCR. Gene expression were normalized to GAPDH and fold changes were calculated by comparing to the expression levels in parental cells (WT). Data are shown as mean  $\pm$  SEM of n = 3, \*P < 0.05, \*\*P < 0.01, \*\*\*P < 0.001 using one-way ANOVA with Tukey's post hoc test.

Supplemental Figure 9

D

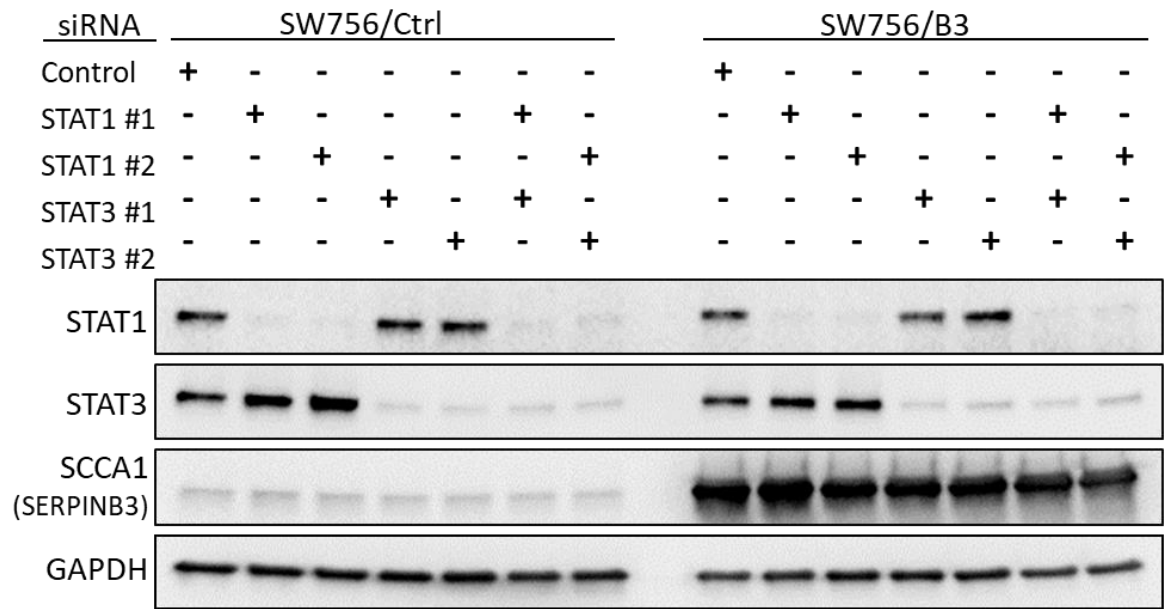

E

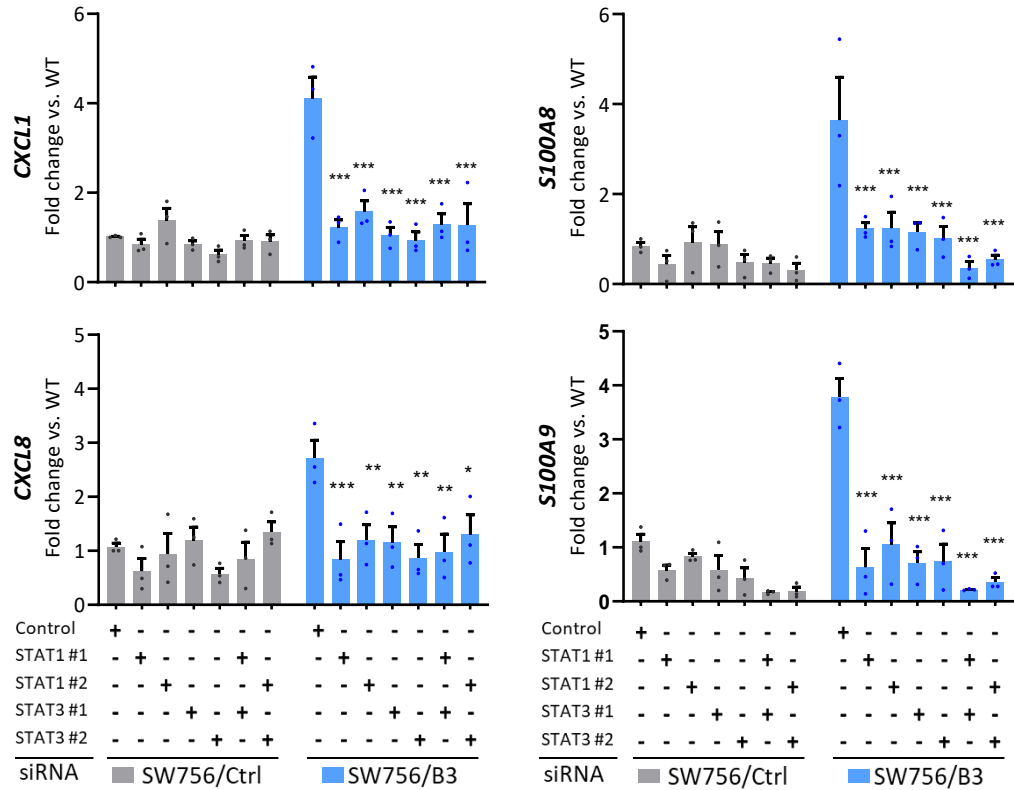

**STAT activation in SERPINB3 cells. (D)** Immunoblotting shows the knockdown of STAT1/3 by siRNA in SW756 cells **(E)** The expression CXCL1/8 and S100A8/A9 mRNA was examined by qPCR after STAT1/3 knockdown. Gene expression were normalized to GAPDH and fold changes were calculated by comparing to the expression levels in SW756/Ctrl transfected with negative control siRNA. Data are shown as mean  $\pm$  SEM of  $n = 3$ , \* $P < 0.05$ , \*\* $P < 0.01$ , \*\*\* $P < 0.001$  using one-way ANOVA with Tukey's post hoc test.

Supplemental Figure 11

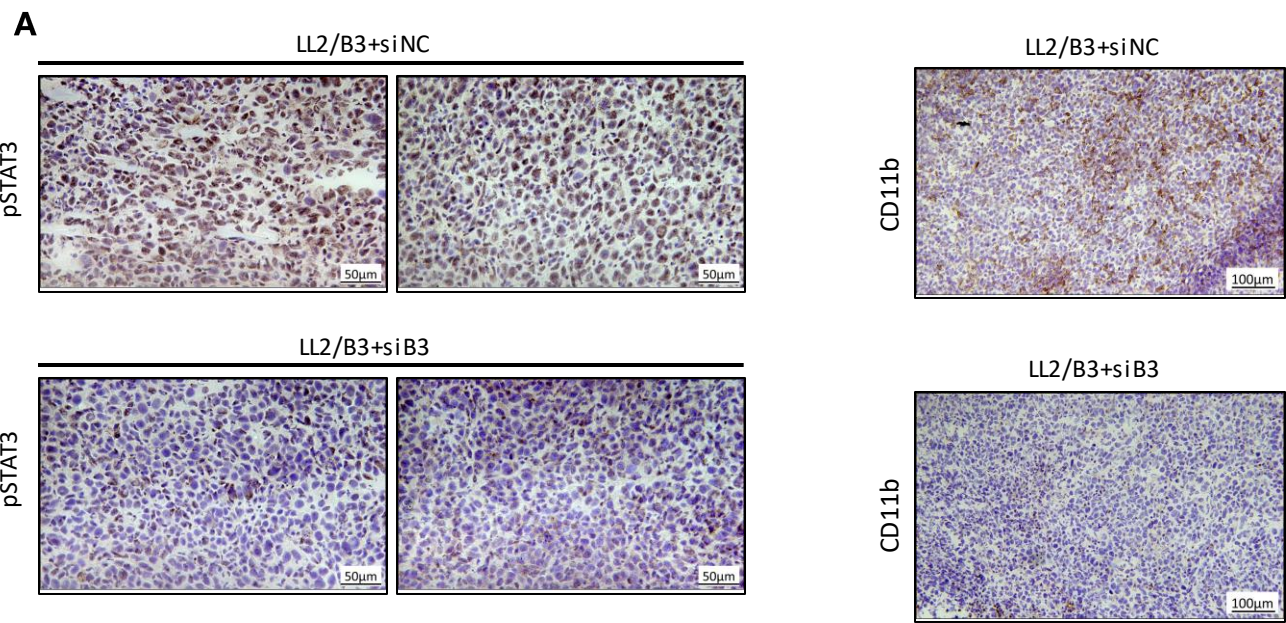

**(A)** Representative immunohistochemistry images of mouse tumors treated with negative control (siNC) or Serpin3a siRNA (siB3) stained with pSTAT3 and CD11b.

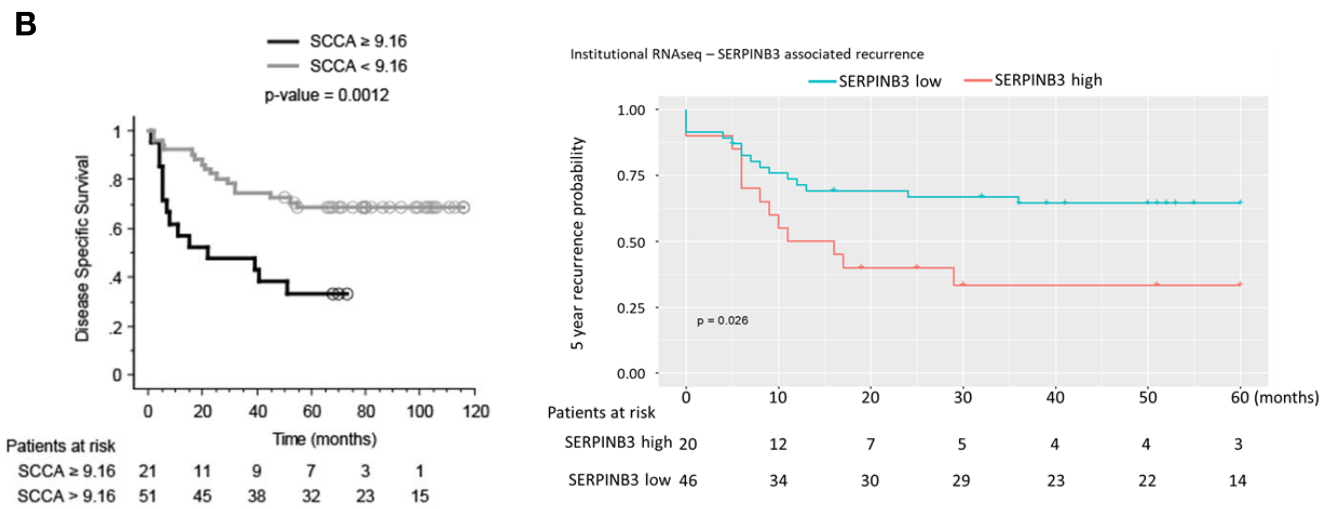

**(B) SCCA prognostic value. Left:** Kaplan-Meier plot show overall survival in patients with serum SCCA  $< 9.16$  ng/ml, compared to patients with serum SCCA  $\geq 9.16$  ng/ml. The average pretreatment serum SCCA value of 9.16 ng/ml from 72 cancer patients was used as a cutoff. **Right:** Recurrence probability of patients with high and low SERPINB3 transcripts from RNAseq cohort.

Supplemental Table 1. Patient characteristics

|                         | SERPINB3/Low |            | SERPINB3/Intermediate |            | SERPINB3/H |           | TMA cohort |
|-------------------------|--------------|------------|-----------------------|------------|------------|-----------|------------|
|                         | R            | NR         | R                     | NR         | R          | NR        |            |
| Patients                | 11           | 11         | 6                     | 16         | 12         | 10        | 72         |
| Age (months)            |              |            |                       |            |            |           |            |
| Median                  | 49           | 53         | 66.5                  | 57         | 51.5       | 53.5      | 52         |
| Range                   | 43-74        | 34-77      | 50-78                 | 25-81      | 42-72      | 32-67     | 27-85      |
| Race                    |              |            |                       |            |            |           |            |
| Asian                   | 1 (9.1%)     | 0          | 0                     | 2 (12.5%)  | 0          | 0         | 3 (4.2%)   |
| Black                   | 3 (27.3%)    | 3 (27.3%)  | 3 (50%)               | 2 (12.5%)  | 1 (8.3%)   | 2 (20%)   | 14 (19.4%) |
| White                   | 7 (63.6%)    | 7 (63.6%)  | 3 (50%)               | 11 (68.8%) | 11 (91.7%) | 8 (80%)   | 54 (75%)   |
| Hispanic                | 0            | 1 (9.1%)   | 0                     | 1 (6.3%)   | 0          | 0         | 1 (1.4%)   |
| FIGO Stage (2018)       |              |            |                       |            |            |           |            |
| I                       | 1 (9.1%)     | 5 (45.5%)  | 0                     | 2 (12.5%)  | 2 (16.7%)  | 1 (10%)   | 11 (15.3%) |
| II                      | 2 (18.2%)    | 3 (27.3%)  | 2 (33.3%)             | 3 (18.8%)  | 1 (8.3%)   | 1 (10%)   | 19 (26.4%) |
| III                     | 5 (45.5%)    | 3 (27.3%)  | 2 (33.3%)             | 10 (62.5%) | 8 (66.7%)  | 8 (80%)   | 37 (51.4%) |
| IV                      | 3 (27.3%)    | 0          | 2 (33.3%)             | 1 (6.3%)   | 1 (8.3%)   | 0         | 5 (6.9%)   |
| Lymph Node Involvement  |              |            |                       |            |            |           |            |
| supraclavicular         | 1 (9.1%)     | 0          | 1 (16.7%)             | 0          | 1 (8.3%)   | 0         | 1 (1.4%)   |
| Aortic                  | 2 (18.2%)    | 0          | 1 (16.7%)             | 0          | 3 (25%)    | 1 (10%)   | 7 (9.7%)   |
| Pelvic                  | 3 (27.3%)    | 1 (9.1%)   | 1 (16.7%)             | 6 (37.5%)  | 4 (33.3%)  | 7 (70%)   | 24 (33.3%) |
| None                    | 5 (45.5%)    | 10 (90.9%) | 2 (33.3%)             | 10 (62.5%) | 4 (33.3%)  | 2 (20%)   | 40 (55.6%) |
| Follow up times (month) |              |            |                       |            |            |           |            |
| Median                  | 44           | 86         | 28                    | 105.5      | 16.5       | 79.5      | 67         |
| Range                   | 2-117        | 62-119     | 2-115                 | 5-119      | 1-102      | 19-113    | 1-119      |
| Histology               |              |            |                       |            |            |           |            |
| Squamous                | 7 (63.6%)    | 6 (54.5%)  | 5 (83.3%)             | 14 (87.5%) | 10 (83.3%) | 10 (100%) | 61 (84.7%) |
| Adenocarcinoma          | 2 (18.2%)    | 5 (45.5%)  | 0                     | 1 (6.3%)   | 1 (8.3%)   | 0         | 6 (8.3%)   |
| Adenosquamous           | 0            | 0          | 1 (16.7%)             | 1 (6.3%)   | 0          | 0         | 1 (1.4%)   |
| Other*                  | 1 (9.1%)     | 0          | 0                     | 0          | 1 (8.3%)   | 0         | 4 (5.6%)   |
| Chemotherapy            | 11 (100%)    | 11 (100%)  | 5 (83.3%)             | 16 (100%)  | 11 (91.7%) | 9 (90%)   | 66 (91.7%) |
| Treatment Intent        |              |            |                       |            |            |           |            |
| Curative                | 9 (81.8%)    | 11 (100%)  | 3 (50%)               | 16 (100%)  | 11 (91.7%) | 10 (100%) | 67 (93.1%) |
| Palliative              | 2 (18.2%)    | 0          | 2 (33.3%)             | 0          | 1 (8.3%)   | 0         | 1 (1.4%)   |
| Post-op                 | 0            | 0          | 0                     | 0          | 0          | 0         | 2 (2.8%)   |
| Surgery Only            | 0            | 0          | 0                     | 0          | 0          | 0         | 1 (1.4%)   |
| None                    | 0            | 0          | 1 (16.7%)             | 0          | 0          | 0         | 1 (1.4%)   |
| Serum SCCA (ng/ml)      |              |            |                       |            |            |           |            |
| Median                  | 1.3          | 1.45       | 1.95                  | 2.9        | 9.65       | 9.7       | 2.9        |
| Range                   | 0-17.1       | 0-4.3      | 0-60                  | 0-26.3     | 0-220      | 1.6-25.5  | 0-66.6     |
| HPV Types               |              |            |                       |            |            |           |            |
| 16                      | 3            | 7          | 4                     | 11         | 5          | 7         | N/A        |
| 18                      | 3            | 1          | 0                     | 0          | 2          | 1         | N/A        |
| negative                | 3            | 2          | 0                     | 2          | 2          | 0         | N/A        |
| Other†                  | 2            | 1          | 2                     | 3          | 3          | 2         | N/A        |
| Recurrence              | 11           | -          | 6                     | -          | 12         | -         | 35         |
| Non-recurrence          | -            | 11         | -                     | 16         | -          | 10        | 37         |

R, recurrence; NR, non-recurrence; N/A, not available

\*Others: leiomyosarcoma, malignant mixed mullerian tumors, small cell

†Other: HPV Types 33, 45, 52, 56, 58, 59, 66

Supplemental Table 2.

| Recurrence free survival        |                           |         |                                |                     |
|---------------------------------|---------------------------|---------|--------------------------------|---------------------|
| Variable                        | Univariate Cox regression |         | Multivariate Cox regression    |                     |
|                                 | HR (95%CI)                | p-value | covariate-adjusted HR (95% CI) | p-value             |
| Age (continuous)                | 0.979 (0.9519 - 1.007)    | 0.137   | 0.9727 (0.9439 - 1.002)        | 0.0709              |
| FIGO                            |                           | 0.9442  |                                | 0.01 <sup>#</sup>   |
| I-II (reference)                | -                         | -       | -                              | -                   |
| III                             | 1.176 (0.5022 - 2.753)    | 0.7092  | 1.0822 (0.4595 - 2.548)        | 0.8566              |
| IV                              | 5.51 (1.5949 - 19.039)    | 0.0069  | 8.9726 (2.3639 - 34.057)       | 0.0013              |
| Race                            |                           |         | -                              | -                   |
| White                           | -                         | -       |                                | -                   |
| non-White                       | 0.8125 (0.3774 - 1.749)   |         | 0.9255 (0.3830 - 2.237)        | 0.8635              |
| SCCA/pSTAT3                     |                           | 0.0487* |                                | 0.0199 <sup>#</sup> |
| Low/Low(reference)              | -                         | -       | -                              | -                   |
| Low/High or High/High           | 1.874 (0.8645 - 4.061)    | 0.112   | 2.2822 (0.9781 - 5.325)        | 0.0563              |
| High/Low                        | 1.367 (1.3267 - 11.593)   | 0.0135  | 5.5454 (1.6563 - 18.566 )      | 0.0055              |
| Cancer specific survival        |                           |         |                                |                     |
| Variable                        | Univariate Cox regression |         | Multivariate Cox regression    |                     |
|                                 | HR (95%CI)                | p-value | covariate-adjusted HR (95% CI) | p-value             |
| Age (continuous)                | 0.9742 (0.9623 - 1.007)   | 0.124   | 0.9624 (0.9276 - 0.9985)       | 0.0413              |
| FIGO                            |                           |         |                                |                     |
| I-II (reference)                | -                         |         | -                              | -                   |
| III                             | 1.121 (0.4105 - 3.061)    | 0.824   | 0.9637 (0.3489 - 47.9586)      | 0.943               |
| IV                              | 7.124 (1.8927 - 26.815)   | 0.0037  | 14.863 (3.49 - 63.35)          | 0.0003              |
| Race                            |                           |         |                                |                     |
| White                           |                           |         |                                |                     |
| non-White                       | 0.5317 (0.1993 - 1.419)   | 0.207   | 0.71 (0.22 - 2.28)             | 0.563               |
| SCCA/pSTAT3                     |                           |         |                                |                     |
| Low/Low(reference)              | -                         |         | -                              |                     |
| Low/High or High/High           | 2.398 (0.921 - 6.243)     | 0.0732  | 2.8384 (0.96 - 8.3679)         | 0.059               |
| High/Low                        | 7.335 (2.209 - 24.359)    | 0.0011  | 11.6529 (2.8314 - 47.9586)     | 0.0007              |
| # Likelihood ratio test P value |                           |         |                                |                     |

Supplemental Table 3.

| Antibodies                                                                    |
|-------------------------------------------------------------------------------|
| Human Antibodies (all from BioLegend unless noted otherwise)                  |
| Pacific Blue anti-human CD3 [SK7, 344824]                                     |
| PE/Cyanine7 anti-human CD4 [RPA-T4, 300512]                                   |
| PerCP anti-human CD8 [SK1, 344708]                                            |
| PE anti-human CD11b [ICRF44, 301305]                                          |
| APC anti-human CD11c [3.9, 301613]                                            |
| FITC anti-human HLA-DR [L243, 307603]                                         |
| CD14-PerCP-Vio 700, human [Tuk4, 130-113-713, MACS]                           |
| PE/Cy7 anti-human CD15 (SSEA-1) [W6D3, 323029]                                |
| Mouse Antibodies (all from BioLegend unless noted otherwise)                  |
| Pacific Blue anti-mouse CD45 [30-F11, 103126]                                 |
| CD45-PE, mouse [REA737, 130-110-797, MACS]                                    |
| Brilliant Violet 510 anti-mouse CD3 [17A2, 100233]                            |
| PE anti-mouse CD4 [GK1.5, 100407]                                             |
| PE/Cy7 anti-mouse CD8a [53-6.7, 100721]                                       |
| FITC anti-mouse CD25 [PC61, 102005]                                           |
| PE anti-mouse F4/80 [BM8, 123110]                                             |
| APC anti-mouse CD163 [S15049I, 115305]                                        |
| FITC anti-mouse Ly-6C [HK1.4, 128005]                                         |
| PF/Cyanine7 anti-mouse Ly-6G [1A8, 127617]                                    |
| Ki-67 antibody, anti-human/mouse, FITC, REAfinity [REA183, 130-117-803, MACS] |
| TNF-a antibody, anti-mouse, FITC, REAfinity [REA636, 130-124-212, MACS]       |
| IFN-g antibody, anti-mouse, APC, REAfinity [REA638, 130-123-283, MACS]        |
| CD11b antibody, anti-mouse, VioBlue, REAfinity [REA592, 130-113-810, MACS]    |
| Brilliant Violet 510 anti-mouse/human CD11b [M1/70, 101245]                   |
| PerCP/Cyanine5.5 anti-mouse CD115 CSF-1R [AFS98, 135525]                      |
| FoxP3 Antibody, anti-mouse, APC, REAfinity [REA788, 130-111-679, MACS]        |
| FITC anti-human/mouse Granzyme B [GB11, 515403]                               |
| Pacific Blue anti-mouse Perforin [S16009B, 154407]                            |
| Antibodies for immunoblotting                                                 |
| Phospho-Stat1 (Tyr701) (58D6) Rabbit mAb [9167, Cell Signaling]               |
| Stat1 p84/p91 (C-136) HRP, mouse [sc-464, Santa Cruz Biotechnology]           |
| p-STAT3 HRP, mouse antibody (B-7) [sc-8059, Santa Cruz Biotechnology]         |
| Stat3 (124J6) mouse [9139S, Cell Signaling]                                   |
| HRP-conjugated GAPDH mouse [HRP-6004, Proteintech]                            |
| Serpin B3/SCCA1 antibody (2F5), mouse [H00006317-M01, Novus Biologicals]      |
| GFP (B-2), mouse [sc-9996, Santa Cruz Biotechnology]                          |
| Jak1 (D1T6W) mouse mAb [50996, Cell Signaling]                                |
| Lamin A/C (4C11) Mouse mAb [4777, Cell Signaling]                             |

Supplemental Table 4.

| Primers         | Forward                  | Backward                |
|-----------------|--------------------------|-------------------------|
| human S100A8    | AGACCGAGTGTCCCTCAGTATATC | TGCCACGCCCATCTTTATC     |
| human S100A9    | GCTGGAACGCAACATAGAGA     | TCGCACCAGCTCTTTGAAT     |
| human CXCL1     | GGATTGTGCCTAATGTGTTTGAG  | GACAGTGTGCAGGTAGAGTTAAT |
| human CXCL8     | CTTGGCAGCCTTCCTGATTT     | GGGTGGAAAGGTTTGGAGTATG  |
| human GAPDH     | CTGGGCTACACTGAGCACC      | AAGTGGTCGTTGAGGGCAATG   |
| human SERPINB3  | CGCGGTCTCGTGCTATCTG      | ATCCGAATCCTACTACAGCGG   |
| mouse CXCL9     | CAGGCTAGGAGTGGTGAAATG    | CAGAGGCCAGAAGAGAGAAATG  |
| mouse CXCL10    | TCAGGCTCGTCAGTTCTAAGT    | CCTTGGGAAGATGGTGGTTAAG  |
| mouse CXCL1     | CGAAGTCATAGCCCACTCAA     | GAGCAGTCTGTCTTCTTTCTCC  |
| mouse SERPINB3A | CATCAGCACAGATAGCAGAAGA   | AGGAGATTCTGCCAAAGAAGAG  |
| mouse CXCL3     | GATACTGAAGAGCGGCAAGT     | CAGGTAAAGACACATCCAGACA  |
| mouse S100A8    | CTTTGTCAGTCCGTCTTCA      | TGTAGAGGGCATGGTGATTTC   |
| mouse S100A9    | CTGGGCTTACACTGCTCTTAC    | GGTGTCGATGATGGTGGTTAT   |
| mouse GAPDH     | AACAGCAACTCCCCTCTTC      | CCTGTTGCTGTAGCCGTATT    |
